# Supplementary material for: Magnetically recyclable Co2P nanosheets as highly efficient catalysts for hydrogen generation from hydrolysis of sodium borohydride
Source: Royal Society of Chemistry journal article supplement (doi:10.1039/d2nj00966h), 2022-01-01
Supplement: d2nj00966h1.pdf [file d2nj00966h1.pdf]

Supplementary Information

**Magnetically recyclable Co<sub>2</sub>P nanosheets as highly efficient catalysts for  
hydrogen generation from hydrolysis of sodium borohydride**

Ye-Pei Li, Guo-Ping Yang, Lei Wei\*, Jing-Yang Liu, Ya-Ni Zhang, Yu-Xin Cui and Ya-Qian Zhou

College of Chemistry and Materials Science, Langfang Normal University, Langfang 065000, P. R.  
China

\*Corresponding author. E-mail: [weilei@lfnu.edu.cn](mailto:weilei@lfnu.edu.cn)

Figure caption

Fig. S1 (a) FE-SEM and (b) TEM images of the prepared CoP-350

Fig. S2 N<sub>2</sub> adsorption-desorption isotherms of the prepared CoP-350

Fig. S3 XPS survey spectrum of the CoP-350 after reusability testing

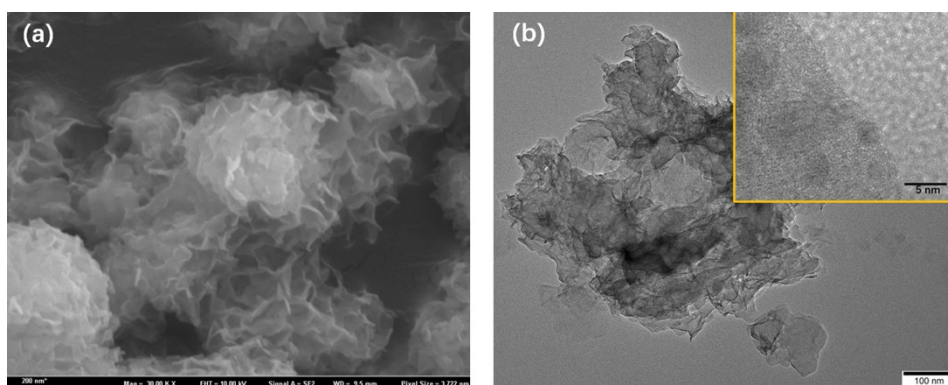

Fig. S1

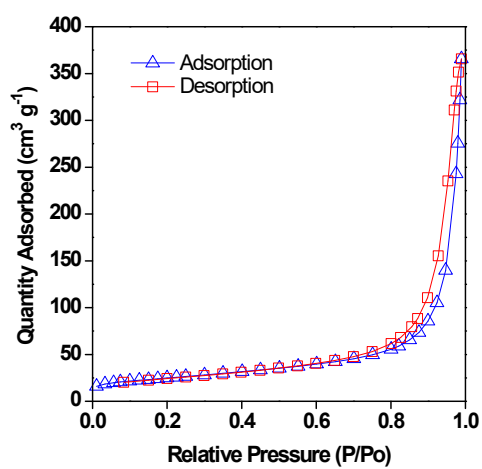

Fig. S2

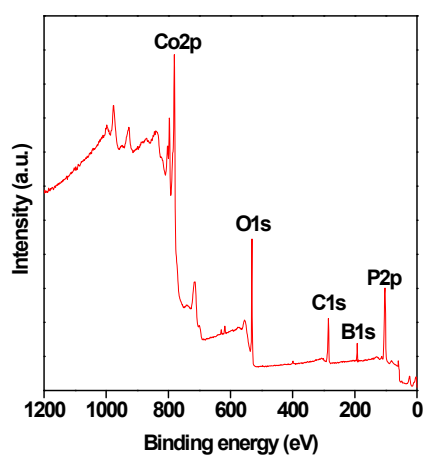

Fig. S3
